# Supplementary material for: Challenges of HIV Self-Test Distribution for Index Testing When HIV Status Disclosure Is Low: Preliminary Results of a Qualitative Study in Bamako (Mali) as Part of the ATLAS Project
Source: PubMed Central journal article supplement (PMC8170018; doi:10.3389/fpubh.2021.653543), 2021-05-19
Supplement: Table_2.pdf [file Table_2.pdf]

## Observation Guide - Meetings Sites

### General information

Location

Type of activity

Moment

Duration

Persons present

### Specific information about the activity

Objective of the activity/order of the day

Profile of the participants

### Questions about HIV and AIDS

Are issues around HIV and AIDS addressed during staff meetings?

By whom?

How are they approached?

Participants' reactions

Positive/negative points discussed

Difficulties around the dispensary?

Negotiations on the terms and conditions of dispensation, the people to whom the self-test should be offered, the information to be provided, etc.

Discussions on HIV partner testing and how to provide self-tests to partners.

Discussions on confidentiality issues
