# Supplementary material for: Challenges of HIV Self-Test Distribution for Index Testing When HIV Status Disclosure Is Low: Preliminary Results of a Qualitative Study in Bamako (Mali) as Part of the ATLAS Project
Source: PubMed Central journal article supplement (PMC8170018; doi:10.3389/fpubh.2021.653543), 2021-05-19
Supplement: Table_3.pdf [file Table_3.pdf]

## Observation Guide - HIV Consultation

### General information

Location

Moment

Duration

Persons present

### HIVST's proposal for the partner

Circumstances: "routine" or specific consultation

Information provided, terms used

### Responses of PLHIV

Questions asked

Acceptance, refusal, request for time to think, more information?

Reasons expressed

### When the HIVST kit is delivered

Description of the kit

Description of the information provided

Description of the questions asked / reactions of the patient

### Social report

Terms and conditions of exchanges

Attitudes and gestures
