# Supplementary material for: Challenges of HIV Self-Test Distribution for Index Testing When HIV Status Disclosure Is Low: Preliminary Results of a Qualitative Study in Bamako (Mali) as Part of the ATLAS Project
Source: PubMed Central journal article supplement (PMC8170018; doi:10.3389/fpubh.2021.653543), 2021-05-19
Supplement: Table_4.pdf [file Table_4.pdf]

### Composition of the ATLAS Team

|                            | <b>ATLAS Research Team</b>                                                                                                                                             |
|----------------------------|------------------------------------------------------------------------------------------------------------------------------------------------------------------------|
| Amani Elvis<br>Georges     | Programme PACCI, ANRS Research Site, Treichville University Hospital, Abidjan, Côte d'Ivoire.                                                                          |
| Badiane Kéba               | Solthis, Sénégal                                                                                                                                                       |
| Bayac Céline               | Solthis, France                                                                                                                                                        |
| Bekelynck Anne             | Programme PACCI, ANRS Research Site, Treichville University Hospital, Abidjan, Côte d'Ivoire                                                                           |
| Boily Marie-Claude         | Medical Research Council Centre for Global Infectious Disease Analysis, Department of Infectious Disease Epidemiology, Imperial College London, London, United Kingdom |
| Boye Sokhna                | Centre Population et Développement, Institut de Recherche pour le Développement, Université Paris Descartes, Inserm, Paris, France                                     |
| Breton Guillaume           | Solthis, Paris, France                                                                                                                                                 |
| d'Elbée Marc               | Department of Global Health and Development, Faculty of Public Health and Policy, London School of Hygiene and Tropical Medicine, London, UK                           |
| Desclaux Alice             | Institut de Recherche pour le Développement, Transvihmi (UMI 233 IRD, 1175 INSERM, Montpellier University), Montpellier, France/CRCF, Dakar, Sénégal                   |
| Desgrées du Loû<br>Annabel | Centre Population et Développement, Institut de Recherche pour le Développement, Université Paris Descartes, Inserm, Paris, France                                     |
| Diop Papa Moussa           | Solthis, Sénégal                                                                                                                                                       |
| Ehui Eboi                  | Directeur Coordonnateur, PNLS                                                                                                                                          |
| Graham Medley              | Department of Global Health and Development, Faculty of Public Health and Policy, London School of Hygiene and Tropical Medicine, London, UK                           |
| Jean Kévin                 | Laboratoire MESuRS, Conservatoire National des Arts et Métiers, Paris, France                                                                                          |
| Keita Abdelaye             | Institut National de Recherche en Santé Publique, Bamako, Mali                                                                                                         |
| Kouassi Kra Arsène         | Centre Population et Développement, Institut de Recherche pour le Développement, Université Paris Descartes, Inserm, Paris, France                                     |
| Ky-Zerbo Odette            | TransVIHMI, IRD, Université de Montpellier, INSERM                                                                                                                     |
| Larmarange<br>Joseph       | Centre Population et Développement, Institut de Recherche pour le Développement, Université Paris Descartes, Inserm, Paris, France                                     |

|                         |                                                                                                                                                                                                                                                                                                          |
|-------------------------|----------------------------------------------------------------------------------------------------------------------------------------------------------------------------------------------------------------------------------------------------------------------------------------------------------|
| Maheu-Giroux Mathieu    | Department of Epidemiology, Biostatistics, and Occupational Health, School of Population and Global Health, McGill University, Montréal, QC, H3A 1A2, Canada                                                                                                                                             |
| Moh Raoul               | 1. Programme PACCI, ANRS Research Site, Treichville University Hospital, Abidjan, Côte d'Ivoire.<br>2. Department of Infectious and Tropical Diseases, Treichville University Teaching Hospital, Abidjan, Côte d'Ivoire.<br>3. Medical School, University Felix Houphouet Boigny, Abidjan, Côte d'Ivoire |
| Mosso Rosine            | ENSEA Ecole Nationale de Statistiques et d'Economie Appliquée, Abidjan, Côte d'Ivoire                                                                                                                                                                                                                    |
| Ndour Cheikh Tidiane    | Division de Lutte contre le Sida et les IST, Ministère de la Santé et de l'Action Sociale Institut d'Hygiène Sociale, Dakar, Sénégal                                                                                                                                                                     |
| Paltiel David           | Yale School of Public Health, New Haven, CT, USA                                                                                                                                                                                                                                                         |
| Pourette Dolorès        | Centre Population et Développement, Institut de Recherche pour le Développement, Université Paris Descartes, Inserm, Paris, France                                                                                                                                                                       |
| Rouveau Nicolas         | Centre Population et Développement, Institut de Recherche pour le Développement, Université Paris Descartes, Inserm, Paris, France                                                                                                                                                                       |
| Silhol Romain           | Medical Research Council Centre for Global Infectious Disease Analysis, Department of Infectious Disease Epidemiology, Imperial College London, London, United Kingdom                                                                                                                                   |
| Simo Fotso Arlette      | Centre Population et Développement, Institut de Recherche pour le Développement, Université Paris Descartes, Inserm, Paris, France                                                                                                                                                                       |
| Terris-Prestholt Fern   | Department of Global Health and Development, Faculty of Public Health and Policy, London School of Hygiene and Tropical Medicine, London, UK                                                                                                                                                             |
| Traore Métogara Mohamed | Solthis, Côte d'Ivoire                                                                                                                                                                                                                                                                                   |
|                         | <b>Solthis coordination team</b>                                                                                                                                                                                                                                                                         |
| Diallo Sanata           | Solthis, Dakar, Sénégal                                                                                                                                                                                                                                                                                  |
| Doumenc-Aïdara Clémence | Solthis, Dakar, Sénégal                                                                                                                                                                                                                                                                                  |
| Geoffroy Olivier        | Solthis, Abidjan, Côte d'Ivoire                                                                                                                                                                                                                                                                          |
| Kabemba Odé Kanku       | Solthis, Bamako, Mali                                                                                                                                                                                                                                                                                    |
| Vautier Anthony         | Solthis, Dakar, Sénégal                                                                                                                                                                                                                                                                                  |
|                         | <b>Implementation in Côte d'Ivoire</b>                                                                                                                                                                                                                                                                   |
| Abokon Armand           | Fondation Ariel Glaser, Côte d'Ivoire                                                                                                                                                                                                                                                                    |

|                      |                                                                             |
|----------------------|-----------------------------------------------------------------------------|
| Anoma Camille        | Espace Confiance, Côte d'Ivoire                                             |
| Diokouri Annie       | Fondation Ariel Glaser, Côte d'Ivoire                                       |
| Kouame Blaise        | Service Dépistage, PNLIS                                                    |
| Kouakou Venance      | Heartland Alliance, Côte d'Ivoire                                           |
| Koffi Odette         | Aprosam, Côte d'Ivoire                                                      |
| Kpolo Alain-Michel   | Ruban Rouge, Côte d'Ivoire                                                  |
| Sanogo Abdoulaye     | Amprode Sahel, Mali                                                         |
| Tety Josiane         | Blety, Côte d'Ivoire                                                        |
| Traore Yacouba       | ORASUR, Côte d'Ivoire                                                       |
|                      | <b>Implementation in Mali</b>                                               |
| Bagendabanga Jules   | FHI 360, Mali                                                               |
| Berthé Djelika       | PSI, Mali                                                                   |
| Diakite Daouda       | Secrétariat Exécutif du Haut Conseil National de Lutte contre le Sida, Mali |
| Diakité Mahamadou    | Danayaso, Mali                                                              |
| Diallo Youssouf      | CSLS/MSHP                                                                   |
| Daouda Minta         | Comité scientifique VIH                                                     |
| Hessou Septime       | Plan Mali                                                                   |
| Kanambaye Saidou     | PSI, Mali                                                                   |
| Kanoute Abdul Karim  | Plan Mali                                                                   |
| Keita Dembele Bintou | Arcad-Sida, Mali                                                            |
| Koné Dramane         | Secrétariat Exécutif du Haut Conseil National de Lutte contre le Sida, Mali |
| Koné Mariam          | AKS, Mali                                                                   |
| Maiga Almoustapha    | Comité scientifique VIH                                                     |
| Nouhoum Telly        | CSLS/MSHP                                                                   |
| Saran Keita Aminata  | Soutoura, Mali                                                              |
| Sidibé Fadiala       | Soutoura, Mali                                                              |

|                          |                                                                                                                            |
|--------------------------|----------------------------------------------------------------------------------------------------------------------------|
| Tall Madani              | FHI 360, Mali                                                                                                              |
| Yattassaye Camara Adam   | Arcad-Sida, Mali                                                                                                           |
|                          | <b>Implementation in Senegal</b>                                                                                           |
| Bâ Idrissa               | CEPIAD, Sénégal                                                                                                            |
| Diallo Papa Amadou Niang | CNLS, Sénégal                                                                                                              |
| Fall Fatou               | DLSI, Ministère de la Santé et de l'action sociale, Sénégal                                                                |
| Guèye NDèye Fatou NGom   | CTA, Sénégal                                                                                                               |
| Ndiaye Sidy Mokhtar      | Enda Santé, Sénégal                                                                                                        |
| Niang Alassane Moussa    | DLSI, Ministère de la Santé et de l'action sociale, Sénégal                                                                |
| Samba Oumar              | CEPIAD, Sénégal                                                                                                            |
| Thiam Safiatou           | CNLS, Sénégal                                                                                                              |
| Turpin Nguissali M.E.    | Enda Santé, Sénégal                                                                                                        |
|                          | <b>Partners</b>                                                                                                            |
| Bouaré Seydou            | Assistant de recherche, Mali                                                                                               |
| Camara Cheick Sidi       | Assistant de recherche, Mali                                                                                               |
| Kouadio Brou Alexis      | Assistant de recherche, Côte d'Ivoire                                                                                      |
| Sarrassat Sophie         | Centre for Maternal, Adolescent, Reproductive and Child Health, London School of Hygiene and Tropical Medicine, London, UK |
| Sow Souleymane           | Assistant de recherche, Sénégal                                                                                            |
