# Supplementary material for: Challenges of HIV Self-Test Distribution for Index Testing When HIV Status Disclosure Is Low: Preliminary Results of a Qualitative Study in Bamako (Mali) as Part of the ATLAS Project
Source: PubMed Central journal article supplement (PMC8170018; doi:10.3389/fpubh.2021.653543), 2021-05-19
Supplement: Table_5.pdf [file Table_5.pdf]

## **Formation des professionnels de santé**

### **Dispensation de l'autotest de dépistage du VIH dans le cadre du projet ATLAS au Mali**

**Manuel du Formateur :**  
**Module 3 – Le rôle, les qualités attendues des professionnels  
de santé et la dispensation de l'autotest de dépistage du VIH  
dans le projet ATLAS**

# Sommaire

|                                                                                                                                               |           |
|-----------------------------------------------------------------------------------------------------------------------------------------------|-----------|
| <b>MODULE 3 – LE ROLE, LES QUALITES ATTENDUES ET LA DISPENSATION DE L'AUTOTEST DE DEPISTAGE DU VIH DANS LE PROJET ATLAS</b>                   | <b>3</b>  |
| a. Résumé du contenu du module 3                                                                                                              | 3         |
| b. Fiche pédagogique du module 3                                                                                                              | 5         |
| c. Référentiel technique du module 3                                                                                                          | 10        |
| <br>                                                                                                                                          |           |
| <b>Séquence n°1</b>                                                                                                                           | <b>10</b> |
| Les enjeux et principes fondamentaux pour le dépistage des différentes populations ciblées                                                    | 10        |
| <i>Sous-séquence 1.1</i> : Expliquer les défis liés à la discrimination et la stigmatisation                                                  | 10        |
| <i>Sous-séquence 1.2</i> : Revenir sur les principes fondamentaux                                                                             | 14        |
| <i>Sous-séquence 1.3</i> : Présenter les populations cibles et l'importance du dépistage                                                      | 16        |
| <br>                                                                                                                                          |           |
| <b>Séquence n°2</b>                                                                                                                           | <b>17</b> |
| Les compétences d'écoute active et de conseil                                                                                                 | 17        |
| <i>Sous-séquence 2.1</i> : Etablir le lien entre le conseil et la dispensation de kits d'ADVIH dans le projet ATLAS                           | 17        |
| <i>Sous-séquence 2.2</i> : Présenter la posture d'écoute active et de conseil                                                                 | 18        |
| <i>Sous-séquence 2.3</i> : Simuler la posture d'écoute active et de conseil dans le cas de la dispensation de kits d'ADVIH                    | 19        |
| <br>                                                                                                                                          |           |
| <b>Séquence n°3</b>                                                                                                                           | <b>20</b> |
| Les spécificités de dispensation de kits d'ADVIH dans le projet ATLAS                                                                         | 20        |
| <i>Sous-séquence 3.1</i> : Introduire aux spécificités de dispensation de kits d'ADVIH                                                        | 20        |
| <i>Sous-séquence 3.2</i> : Les aspects éthiques et les implications propres à la notification                                                 | 20        |
| <i>Sous-séquence 3.3</i> : Présenter les différentes modalités de dispensation ATLAS dans la pratique                                         | 24        |
| <br>                                                                                                                                          |           |
| <b>Séquence n°4</b>                                                                                                                           | <b>25</b> |
| L'importance et les défis du lien vers la confirmation et l'entrée dans les soins                                                             | 25        |
| <i>Sous-séquence 4.1</i> : Expliquer l'objectif final derrière l'acte de dépistage : aller confirmer le diagnostic et commencer un traitement | 25        |
| <br>                                                                                                                                          |           |
| <b>Séquence n°5</b>                                                                                                                           | <b>27</b> |
| Conseil et messages associés à la dispensation non-assistée de kits d'ADVIH                                                                   | 27        |
| <i>Sous-séquence 5.1</i> : Rappeler les messages clés                                                                                         | 27        |

|                                                                                                                |    |
|----------------------------------------------------------------------------------------------------------------|----|
| <i>Sous-séquence 5.2</i> : Présenter les consignes                                                             | 27 |
| <i>Sous-séquence 5.3</i> : Mettre en exergue les caractéristiques spécifiques de la dispensation non-assistée  | 27 |
| <b>Séquence n°6</b>                                                                                            | 28 |
| Les outils de suivi-évaluation                                                                                 | 28 |
| <i>Sous-séquence 6.1</i> :<br>Présenter les différents outils                                                  | 28 |
| <i>Sous-séquence 6.2</i> :<br>Tester les outils                                                                | 29 |
| <b>Séquence n°7</b>                                                                                            | 30 |
| Conclusion                                                                                                     | 30 |
| <i>Sous-séquence 7.1</i> :<br>Revenir sur des points incompris et clôturer la formation                        | 30 |
| <i>Sous-séquence 7.2</i> :<br>Apprécier le niveau de satisfaction des participants selon différents paramètres | 30 |

## MODULE 3 – LE ROLE, LES QUALITES ATTENDUES DES EDUCATEURS PAIRS ET LA DISPENSATION DE L'AUTOTEST DE DEPISTAGE DU VIH DANS LE PROJET ATLAS

### a. Résumé du contenu du module 3

**Durée :** 1 jour (8 heures, pauses incluses)

#### **Objectifs**

**pédagogiques :** A l'issue de ce module les participants seront capables :

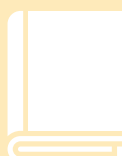

#### **Savoir :**

- D'expliquer les particularités du dépistage des publics ciblés.
- D'expliquer le fonctionnement des outils de suivi et évaluation.

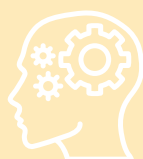

#### **Savoir-faire :**

- De dispenser l'autotest de dépistage du VIH OraQuick aux personnes avec les différents supports disponibles en utilisant les messages associés.
- De pratiquer la notification au partenaire des PVVIH de façon adaptée.
- De remplir les outils de suivi et évaluation.

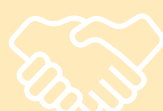

#### **Savoir-être :**

- Adopter une posture de dispensateur, véhiculant des valeurs d'écoute active, de conseil, de non-stigmatisation et de non-discrimination.

**Méthodologie :** Exposé, simulation, jeu de rôles et exercices pratiques

**Le module est divisé en 7 séquences et 18 sous-séquences :**

1. Les enjeux et principes fondamentaux pour le dépistage des différentes populations ciblées
  - 1.1 Expliquer les défis liés à la discrimination et la stigmatisation
  - 1.2 Revenir sur les principes fondamentaux du dépistage
  - 1.3 Présenter les populations cibles et l'importance du dépistage
2. Les compétences d'écoute active et de conseil
  - 2.1 Etablir le lien entre le conseil et la dispensation de kits d'ADVIH dans le projet ATLAS
  - 2.2 Présenter la posture d'écoute active et de conseil
  - 2.3 Simuler la posture d'écoute active et de conseil dans le cas de la dispensation de kits d'ADVIH
3. Les spécificités de dispensation de l'autotest de dépistage du VIH dans le projet ATLAS
  - 3.1 Introduire aux spécificités de dispensation de kits d'ADVIH
  - 3.2 Présenter les aspects éthiques et les implications propres à la notification
  - 3.3 Présenter les différentes modalités de dispensation ATLAS dans la pratique
4. L'importance et les défis du lien vers la confirmation et l'entrée dans les soins
  - 4.1 Expliquer l'objectif final derrière l'acte de dépistage : aller confirmer le diagnostic et commencer un traitement

5. Conseil et messages associés à la dispensation non-assistée et assistée de l'autotest de dépistage du VIH OraQuick
  - 5.1 Rappeler les messages clés
  - 5.2 Présenter les signes
  - 5.3 Mettre en exergue les caractéristiques spécifiques de la dispensation non-assistée
  
6. Les outils de suivi-évaluation
  - 6.1 Présenter les différents outils
  - 6.2 Tester les outils
  
7. Conclusion
  - 7.1 Revenir sur des points incompris et clôturer la formation
  - 7.2 Apprécier le niveau de satisfaction des participants selon différents paramètres

b. Fiche pédagogique du module 3

**JOUR 2**

| Horaire           | Séquence                                                                       | Objectifs                                                                                | Temps                                                                                                                                                                                                 | Méthode                                                                                                                                                                                                                                                                                                                                                                                                                                 | Support             | Observations                                                                                                                                                                        |
|-------------------|--------------------------------------------------------------------------------|------------------------------------------------------------------------------------------|-------------------------------------------------------------------------------------------------------------------------------------------------------------------------------------------------------|-----------------------------------------------------------------------------------------------------------------------------------------------------------------------------------------------------------------------------------------------------------------------------------------------------------------------------------------------------------------------------------------------------------------------------------------|---------------------|-------------------------------------------------------------------------------------------------------------------------------------------------------------------------------------|
| 9H00              | Les enjeux et principes fondamentaux pour le dépistage des populations ciblées | Expliquer les défis liés à la discrimination et la stigmatisation                        | 15mn                                                                                                                                                                                                  | Exposé du formateur sur les défis de la discrimination et la stigmatisation.                                                                                                                                                                                                                                                                                                                                                            | PPT (diapo 4 à 8)   | Encourager la réaction des participants et susciter le débat afin qu'ils interviennent pour apporter leur point de vue (mais attention à bien veiller au respect du temps imparti). |
|                   |                                                                                | Revenir sur les principes fondamentaux                                                   | 20mn                                                                                                                                                                                                  | <u>Rappel du formateur sur :</u><br>- Les principales barrières d'accès aux services de dépistage et comment l'ADVIH y répond de manière complémentaire<br>- Rappel des 5 C<br>- Rappel de la complémentarité de l'ADVIH par rapport au dépistage classique                                                                                                                                                                             | PPT (diapo 9 à 11)  |                                                                                                                                                                                     |
|                   | Présenter les populations cibles et l'importance du dépistage                  | 20mn                                                                                     | - Rappel du formateur sur l'importance du dépistage auprès des populations cibles du projet ATLAS<br>- Populations clés (HSH/TS) et partenaire<br>- Partenaires des PVIH, patients IST et partenaires | PPT (diapo 12 à 13)                                                                                                                                                                                                                                                                                                                                                                                                                     |                     |                                                                                                                                                                                     |
| 10H00             | Les compétences d'écoute active et de conseil                                  | Valider l'atteinte des objectifs de la séquence                                          | 5mn                                                                                                                                                                                                   | Avant de passer à la prochaine séquence, demander aux participants s'ils ont des questions et y répondre.                                                                                                                                                                                                                                                                                                                               | -                   |                                                                                                                                                                                     |
|                   |                                                                                | Etablir le lien entre le conseil et la dispensation de kits d'ADVIH dans le projet ATLAS | 15mn                                                                                                                                                                                                  | Exposé du formateur sur le lien entre le conseil et la dispensation de kits d'ADVIH dans le projet ATLAS :<br>- Le conseil dans le cas d'une dispensation primaire assistée (professionnels de la santé, pairs éducateurs et écoutants à distance)<br>- Le conseil dans le cas d'une dispensation non assistée (la personne fera le test chez elle) ou pour la distribution secondaire (professionnels de la santé et pairs éducateurs) | PPT (diapo 15 à 16) |                                                                                                                                                                                     |
| 10H30             |                                                                                | Présenter la posture d'écoute active et de conseil                                       | 15mn                                                                                                                                                                                                  | - Le formateur demande aux participants ce qu'ils connaissent de la posture d'écoute active et de la posture de conseil, leurs différences<br>- Le formateur note les réponses et apporte les éléments complémentaires si nécessaires                                                                                                                                                                                                   | Flipchart + feutre  | Annoncer l'exercice de simulation à venir après la pause-café.                                                                                                                      |
| PAUSE CAFE (30MN) |                                                                                |                                                                                          |                                                                                                                                                                                                       |                                                                                                                                                                                                                                                                                                                                                                                                                                         |                     |                                                                                                                                                                                     |

| Horaire | Séquence                                                              | Objectifs                                                                                                         | Temps | Méthode                                                                                                                                                                                                                                                                                                                                                                                                                                                                                                                                                                                                                                                     | Support                                  | Observations |
|---------|-----------------------------------------------------------------------|-------------------------------------------------------------------------------------------------------------------|-------|-------------------------------------------------------------------------------------------------------------------------------------------------------------------------------------------------------------------------------------------------------------------------------------------------------------------------------------------------------------------------------------------------------------------------------------------------------------------------------------------------------------------------------------------------------------------------------------------------------------------------------------------------------------|------------------------------------------|--------------|
|         |                                                                       |                                                                                                                   | 5mn   | Le formateur distribue à l'ensemble des participants la fiche de simulations. Le formateur lit la partie consigne, demande si l'ensemble des participants a compris, si des questions demeurent il y répond.                                                                                                                                                                                                                                                                                                                                                                                                                                                | Fiche de simulations (partie consigne)   |              |
| 11H00   | Les compétences d'écoute active et de conseil                         | Simuler la posture d'écoute active et de conseil dans le cas de la dispensation de l'autotest de dépistage du VIH | 20mn  | <p><u>Simulation, situation de pré-conseil, avant le dépistage :</u></p> <ul style="list-style-type: none"> <li>- Le formateur invite un binôme au centre de la salle pour pratiquer la première simulation. Il lit le scénario de la première simulation, demande si l'ensemble des participants a compris, si des questions demeurent, il y répond</li> <li>- Le formateur rappelle que les autres participants, les observateurs, doivent se référer aux « champs d'observations » pour formuler leurs remarques</li> <li>- Les autres participants observent la simulation et notent leurs commentaires sur un carnet pour en discuter après</li> </ul> | Fiche de simulations (partie simulation) |              |
|         |                                                                       |                                                                                                                   | 10mn  | Débriefing de la simulation : le formateur demande aux observateurs ce qu'ils ont pu noter comme bonne pratique et/ou erreurs commises par les participants en fonction des champs d'observation. Il note les principales observations.                                                                                                                                                                                                                                                                                                                                                                                                                     | Flipchart + feutre                       |              |
|         |                                                                       | Valider l'atteinte des objectifs de la séquence                                                                   | 5mn   | Avant de passer à la prochaine séquence, demander aux participants s'ils ont des questions et y répondre.                                                                                                                                                                                                                                                                                                                                                                                                                                                                                                                                                   | -                                        |              |
|         |                                                                       | Introduire aux spécificités de dispensation de kits d'ADVIH                                                       | 10mn  | Présentation du formateur sur l'introduction aux spécificités des modalités de dispensation de kits d'ADVIH dans le projet ATLAS.                                                                                                                                                                                                                                                                                                                                                                                                                                                                                                                           | PPT (diapo 19)                           |              |
| 11H40   | Les spécificités de dispensation de kits d'ADVIH dans le projet ATLAS | Présenter les aspects éthiques et les implications propres à la notification                                      | 10mn  | <p>Les participants se répartissent en groupe de 3 ou 4 personnes</p> <p>En groupe, ils réalisent un brainstorming et notent leurs réponses relatives aux questions suivantes :</p> <ul style="list-style-type: none"> <li>- Quelles sont les aspects éthiques à prendre en compte lors de l'offre de l'ADVIH pour un partenaire ?</li> <li>- Quels sont les implications de la notification des partenaires des PVIH ?</li> </ul> <p>Les participants restituent leurs réflexions, le formateur note les réponses des participants pour chaque question et procède à une synthèse</p>                                                                      | -                                        |              |

| Horaire | Séquence                                                                                | Objectifs                                                                                                          | Temps | Méthode                                                                                                                                                                                                                                                                                                                                                                                                                       | Support                                      | Observations                                                                                                                                                                      |
|---------|-----------------------------------------------------------------------------------------|--------------------------------------------------------------------------------------------------------------------|-------|-------------------------------------------------------------------------------------------------------------------------------------------------------------------------------------------------------------------------------------------------------------------------------------------------------------------------------------------------------------------------------------------------------------------------------|----------------------------------------------|-----------------------------------------------------------------------------------------------------------------------------------------------------------------------------------|
| 11H40   | Les spécificités de dispensation de kits d'ADVHI dans le projet ATLAS                   | Présenter les aspects éthiques et les implications propres à la notification                                       | 30mn  | Le formateur réalise un exposé sur :<br>- La notification des partenaires des PWVIH, ses implications et sa mise en œuvre dans le cadre du projet ATLAS<br>- Exemples de stratégies pour la notification dans le projet ATLAS                                                                                                                                                                                                 | PPT (diapo 20 à 26)                          |                                                                                                                                                                                   |
|         |                                                                                         | Présenter les différentes modalités de dispensation ATLAS dans la pratique                                         | 20mn  | Présentation du formateur sur les spécificités de la dispensation ATLAS dans la pratique :<br>- Partenaires PWVIH<br>- Partenaires IST                                                                                                                                                                                                                                                                                        | PPT (diapo 27 à 31)                          | Encourager la réaction des participants et susciter le débat afin qu'ils interviennent pour apporter leur point de vue (mais attention à bien veiller au respect du temps impart) |
| 12H55   |                                                                                         | Valider l'atteinte des objectifs de la séquence                                                                    | 5mn   | Avant de passer à la prochaine séquence, demander aux participants s'ils ont des questions et y répondre.                                                                                                                                                                                                                                                                                                                     | -                                            |                                                                                                                                                                                   |
|         |                                                                                         |                                                                                                                    |       | PAUSE DEJEUNER (1H10)                                                                                                                                                                                                                                                                                                                                                                                                         |                                              |                                                                                                                                                                                   |
| 14H05   | L'importance et les défis du lien vers la confirmation et l'entrée dans les soins       | Expliquer l'objectif final derrière l'acte de dépistage : aller confirmer le diagnostic et commencer un traitement | 20mn  | Exposé du formateur sur :<br>- L'importance et les défis du lien vers la confirmation et l'entrée dans les soins<br>- Les bénéfices du lien vers la confirmation et l'entrée dans les soins pour la personne avec un résultat réactif<br>- Barrières existantes pour assurer l'entrée dans les soins dans le cadre de l'ADVHI et stratégies/outils pour les surmonter                                                         | PPT (diapo 32 à 36)                          |                                                                                                                                                                                   |
|         |                                                                                         | Valider l'atteinte des objectifs de la séquence                                                                    | 5mn   | Avant de passer à la prochaine séquence, demander aux participants s'ils ont des questions et y répondre.                                                                                                                                                                                                                                                                                                                     | -                                            |                                                                                                                                                                                   |
|         |                                                                                         | Rappeler les messages clés                                                                                         | 5mn   | Le formateur rappelle les messages clés vu lors du module 2 et annonce le jeu de rôle à suivre pour chaque catégorie d'acteurs.                                                                                                                                                                                                                                                                                               | Fiche pratique<br>- Messages clés            |                                                                                                                                                                                   |
| 14H30   | Conseil et messages associés à la dispensation non-assistée et assistée de kits d'ADVHI | Présenter les consignes                                                                                            | 10mn  | Le formateur présente les règles du jeu de rôle :<br>- L'ensemble des participants se répartissent en binômes (A) et (B) ;<br>- Le formateur distribue aux participants la fiche pratique « messages clés de dispensation » et les scripts propres à chaque jeu de rôle. Ces scripts précisent le scénario à suivre par chaque binôme ;<br>- Le formateur demande aux participants s'ils ont des questions de compréhensions. | Fiche Jeu de rôle 1 et 2 (partie : consigne) |                                                                                                                                                                                   |



| Horaire | Séquence                                                                                | Objectifs                                                                                      | Temps             | Méthode                                                                                                                                                                                                                                                                                                                                                                                                                                                                                                                                                                          | Support                                                       | Observations |
|---------|-----------------------------------------------------------------------------------------|------------------------------------------------------------------------------------------------|-------------------|----------------------------------------------------------------------------------------------------------------------------------------------------------------------------------------------------------------------------------------------------------------------------------------------------------------------------------------------------------------------------------------------------------------------------------------------------------------------------------------------------------------------------------------------------------------------------------|---------------------------------------------------------------|--------------|
| 14H30   | Conseil et messages associés à la dispensation non-assistée et assistée de kits d'ADVIH | Mettre en exergue les caractéristiques spécifiques de la dispensation non-assistée et assistée | 25mn              | <p><b>Jeu de rôle :</b></p> <ul style="list-style-type: none"> <li>- Les participants se répartissent en binômes</li> <li>- Un participant joue (A) et un autre (B) pendant une dizaine de minutes</li> </ul>                                                                                                                                                                                                                                                                                                                                                                    | Fiche Jeu de rôle<br>Fiche pratique - Messages clés           |              |
|         |                                                                                         | Valider l'atteinte des objectifs de la séquence                                                | 10mn              | <p>A l'issue du jeu de rôles, le formateur demande aux binômes les points d'apprentissage qui ressortent de cette expérience.</p> <p>Le formateur note les réponses au fur et à mesure et procède à la synthèse des enseignements généraux et des recommandations à mémoriser.</p> <p>Avant de passer à la prochaine séquence, demander aux participants s'ils ont des questions et y répondre. Demander aux participants s'ils pensent être en mesure de reproduire cette séquence de formation et s'ils ont des questions par rapport à cet aspect.</p>                        | Flipchart + feutre<br>Fiche jeu de rôle 1 (partie débriefing) |              |
| 15H25   |                                                                                         |                                                                                                |                   | PAUSE CAFE (30MN)                                                                                                                                                                                                                                                                                                                                                                                                                                                                                                                                                                |                                                               |              |
| 15H55   | Les outils de suivi-évaluation                                                          | Présenter les différents outils                                                                | 15mn              | <p><b>Exposer du formateur sur :</b></p> <ul style="list-style-type: none"> <li>- Les principes et objectifs du suivi évaluation ATLAS : Recherche à visée évaluative et Intégration au système de santé</li> <li>- Que cherche-t-on à suivre et évaluer : spécificités du projet ATLAS</li> <li>- La collecte de routine par les professionnels de la santé <ul style="list-style-type: none"> <li>• Pourquoi ?</li> <li>• Qui collecte quoi ? Présentation des outils</li> <li>• Quand/ A quelle fréquence</li> <li>• Comment (présentation des outils)</li> </ul> </li> </ul> | PPT (diapo 38 à 42)<br>Outils de collecte                     |              |
|         |                                                                                         |                                                                                                | 15mn              | Les participants testent chaque outil en les renseignant un par un.                                                                                                                                                                                                                                                                                                                                                                                                                                                                                                              | Outils de collecte                                            |              |
|         |                                                                                         | 5mn                                                                                            | Tester les outils | Le formateur invite les participants à s'exprimer sur l'exercice de renseignement de chaque catégorie d'outils : y-a-t-il des incompréhensions ou des difficultés particulières ?                                                                                                                                                                                                                                                                                                                                                                                                | -                                                             |              |
|         |                                                                                         | Valider l'atteinte des objectifs de la séquence                                                | 5mn               | Avant de passer à la prochaine séquence, demander aux participants s'ils ont des questions et y répondre.                                                                                                                                                                                                                                                                                                                                                                                                                                                                        | -                                                             |              |

| Horaire | Séquence   | Objectifs                                                                                                                                     | Temps        | Méthode                                                                                                                                                                                                                                                                                                                                                                                 | Support                                 | Observations |
|---------|------------|-----------------------------------------------------------------------------------------------------------------------------------------------|--------------|-----------------------------------------------------------------------------------------------------------------------------------------------------------------------------------------------------------------------------------------------------------------------------------------------------------------------------------------------------------------------------------------|-----------------------------------------|--------------|
| 16H35   | Conclusion | Revenir sur des points incompris et clôturer la formation<br>Apprécier le niveau de satisfaction des participants selon différents paramètres | 15mn<br>10mn | Le formateur invite les participants à s'exprimer sur des interrogations, des difficultés ou des craintes qu'ils pourraient avoir, avant de clôturer la formation et leur souhaiter bonne chance.<br>Le formateur distribue la fiche d'évaluation aux apprenants qui procède à leur renseignement.<br>Le formateur fera une synthèse des fiches d'évaluation à l'issue de la formation. | -<br>Fiche d'évaluation de la formation |              |
| 17H00   |            |                                                                                                                                               |              | FIN                                                                                                                                                                                                                                                                                                                                                                                     |                                         |              |

### c. Référentiel technique du module 3

|                               |                                                                                                                                                                                                                                                                                                                                                                                              |
|-------------------------------|----------------------------------------------------------------------------------------------------------------------------------------------------------------------------------------------------------------------------------------------------------------------------------------------------------------------------------------------------------------------------------------------|
| <b>Séquence n°1</b>           | Les enjeux et principes fondamentaux pour le dépistage des différentes populations ciblées.                                                                                                                                                                                                                                                                                                  |
| <b>Objectifs pédagogiques</b> | A la fin de cette séquence, les participants auront : <ul style="list-style-type: none"><li>- Compris les défis liés à la discrimination et la stigmatisation</li><li>- Révisé les principes fondamentaux de la stratégie ATLAS et de la dispensation de l'ADVIH</li><li>- Compris quelles sont les populations cibles et l'importance d'une stratégie de dépistage les concernant</li></ul> |
| <b>Durée</b>                  | 1 heure maximum                                                                                                                                                                                                                                                                                                                                                                              |
| <b>Matériel</b>               | Pour réaliser cette séquence, le formateur aura besoin : <ul style="list-style-type: none"><li>- Du support de présentation PPT</li><li>- D'un kit de projection (ordinateur, vidéoprojecteur, écran)</li></ul>                                                                                                                                                                              |

#### **Sous-séquence 1.1 : Expliquer les défis liés à la discrimination et la stigmatisation**

**Durée :** 15 minutes

**Méthode :** En s'appuyant sur la présentation Power Point (PPT) mise à disposition, le formateur réalise un exposé sur les défis de la discrimination et la stigmatisation.

#### **Référentiel technique :**

Dans le cadre du projet ATLAS, plusieurs défis en lien avec les phénomènes de discrimination/stigmatisation se posent.

#### **La discrimination/stigmatisation à l'égard des PVVIH**

Les peurs irrationnelles liées à l'infection à VIH et les attitudes et jugements négatifs à l'égard des personnes vivant avec le VIH persistent en dépit des campagnes d'information du public et autres efforts de sensibilisation menés depuis des dizaines d'années.

La stigmatisation à l'égard des personnes vivant avec le VIH ou exposées au risque d'infection à VIH conduit à des comportements discriminatoires dans tous les secteurs de la société (de la part des fonctionnaires, policiers, professionnels de la santé, et sur le lieu de travail, dans les écoles et au sein des communautés). Cette stigmatisation et cette discrimination découragent les individus d'accéder aux services de santé, y compris aux méthodes de prévention du VIH, de connaître leur statut VIH, de s'inscrire à des programmes de soin et de suivre leur traitement.

Comme toutes les informations relatives aux patients, les résultats d'un test VIH doivent être gardés confidentiels par les professionnels de la santé : les atteintes à la confidentialité sapent la confiance et ont un véritable impact sur la volonté des personnes à se faire dépister. Les inquiétudes concernant la confidentialité du dépistage du VIH et des résultats du test ont été identifiées comme un obstacle majeur à l'accès au dépistage du VIH dans les différentes régions.

Un examen systématique des études menées en Afrique subsaharienne a révélé que les craintes de stigmatisation et de discrimination qui pouvaient résulter d'une potentielle atteinte à la confidentialité comprenaient la peur de l'exclusion sociale, la perte de soutien social et de partenaires sexuels, les relations conjugales tendues (pouvant entraîner un abandon, un divorce ou des violences) et la baisse des possibilités de mariage. Être vu dans un centre de dépistage du VIH était également perçu comme reflétant une promiscuité sexuelle et un statut séropositif.

Les enquêtes menées auprès des prestataires de soins de santé indiquent que les craintes des personnes vivant avec le VIH, et des personnes qui pensent qu'elles pourraient avoir été infectées à VIH, sont souvent fondées. La stigmatisation liée au VIH et les comportements discriminatoires à l'égard des personnes vivant avec le VIH rapportés par les prestataires de soins de santé sont les suivants :

- Refus de prise en charge des personnes vivant avec le VIH.
- Fourniture de soins de moins bonne qualité aux personnes vivant avec le VIH (par rapport aux autres personnes).
- Divulgence du statut VIH sans l'autorisation de la PVVIH.
- Orientation des personnes vivant avec le VIH vers d'autres professionnels de la santé en raison d'un refus de les traiter.

Il est inquiétant de noter que la violence subie par les personnes vivant avec le VIH en raison de leur statut VIH est très répandue dans une grande partie du monde. La violence nuit directement aux personnes vivant avec le VIH, et la menace de la violence les décourage de révéler leur statut VIH à leurs partenaires, à leur famille, aux professionnels de la santé et à la communauté. Cacher sa séropositivité limite les possibilités de recevoir un soutien et des soins vitaux, deux éléments cruciaux pour le déclenchement et l'observance du traitement.

### **La discrimination/stigmatisation à l'égard des populations clés**

Les populations exposées à un risque accru d'infection à VIH font face à des niveaux élevés de stigmatisation en raison, entre autres, de leur sexe, de leur orientation sexuelle, de leur identité de genre, de leur consommation de drogues ou de leur statut de travailleur du sexe.

Des données provenant de nombreux pays montrent qu'un grand nombre de personnes relevant des populations clés évitent le dépistage du VIH. A cela s'ajoute la crainte d'un résultat positif et la stigmatisation future liée au VIH. Nous sommes donc ici face à des enjeux de double discrimination

La stigmatisation des populations clés est renforcée par des lois pénales et d'autres obstacles structurels qui alimentent à leur tour la violence, l'exploitation et un climat de peur entravant les efforts visant à fournir des préservatifs, à réduire les risques et à proposer d'autres méthodes de prévention primaire à des niveaux de couverture suffisants. Souvent, cette violence est exercée en toute impunité, parfois même par les agents de la force publique.

La stigmatisation sociétale à l'égard des populations clés, principalement les travailleurs du sexe, les usagers de drogues, les transgenres et les hommes ayant des rapports sexuels avec des hommes, a conduit à l'adoption, dans de nombreux pays, de législations et politiques criminalisant certaines dispositions à l'encontre de ces populations. Ces dispositions sont nécessairement un frein/une entrave pour ces populations dans l'accès aux programmes de prévention, de dépistage et de prise en charge du VIH.

## Les effets de la stigmatisation et de la discrimination sur l'accès aux soins de santé pour la prévention, le dépistage et le traitement

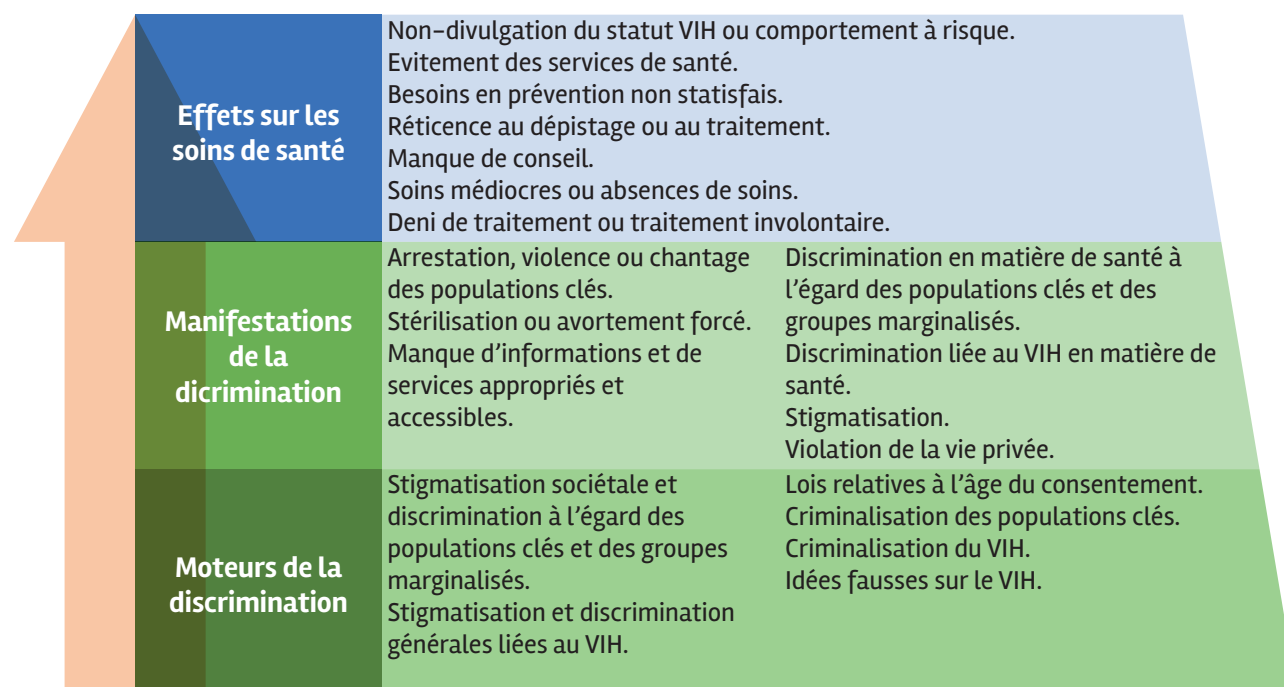

Les lois pénales, les attitudes communautaires, la désinformation, les préjugés et la peur constituent autant de moteurs de la stigmatisation et de manifestations de la discrimination qui affectent l'accès aux soins de santé des personnes vivant avec le VIH et des populations clés.

## L'élimination de la stigmatisation et de la discrimination renforce l'accès aux soins de santé pour la prévention, le dépistage et le traitement

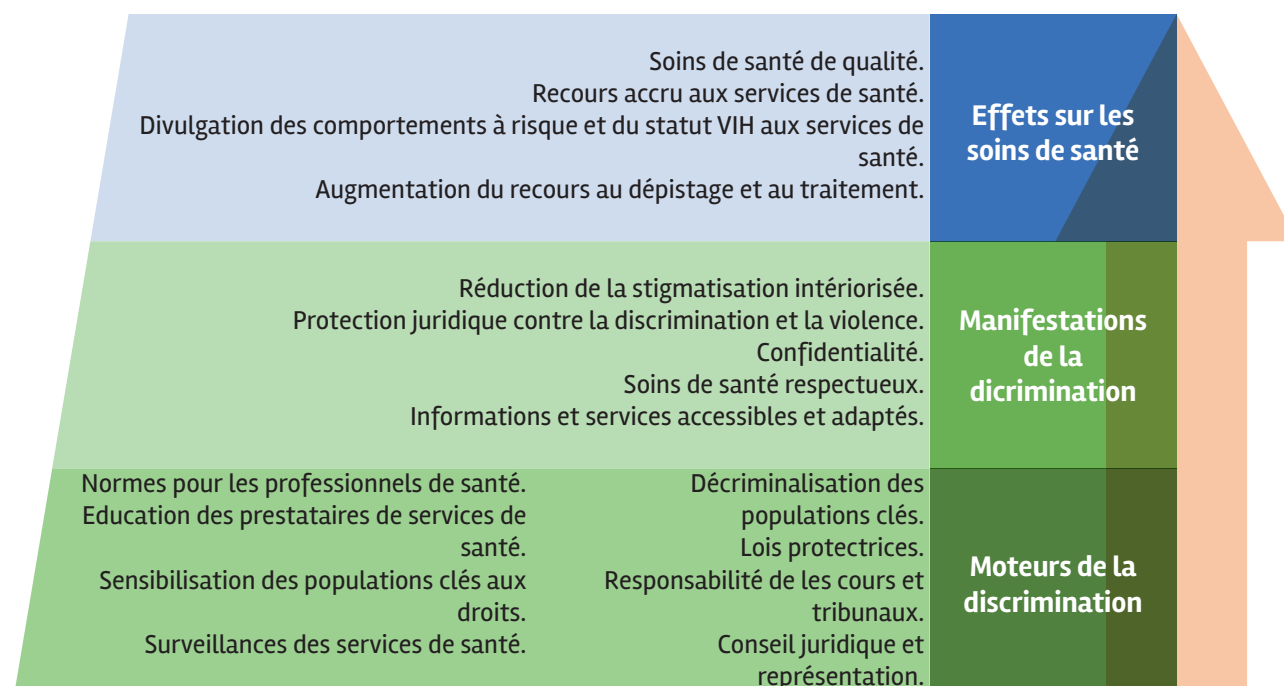

Si l'on s'attaque à ces facteurs, en éliminant les lois néfastes, en introduisant des lois protectrices, en éduquant les détenteurs de droits et les fournisseurs de services et en habilitant les communautés à défendre leurs droits, on peut combler le fossé existant entre ceux qui peuvent accéder aux services et ceux qui ne peuvent pas, favorisant ainsi la santé de tous.

## Éléments clés pour le formateur

- La stigmatisation à l'égard des personnes vivant avec le VIH conduit à des comportements discriminatoires dans tous les secteurs de la société.
- Cela décourage les individus d'accéder aux services de santé, y compris aux méthodes de prévention du VIH, de connaître leur statut VIH, de s'inscrire à des programmes de soin et de suivre leur traitement.
- En ce sens l'auto dépistage offre une réelle alternative pour inviter les personnes à se dépister en toute discrétion. Cependant il est important de rappeler qu'en cas de résultat réactif, la personne devra réaliser un test de confirmation qui se fera dans un centre de dépistage.
- Les populations clés font face à des niveaux élevés de stigmatisation en raison, entre autres, de leur sexe, de leur orientation sexuelle, de leur identité de genre, de leur consommation de drogues ou de leur statut de travailleur du sexe. Cela constitue une double stigmatisation lorsqu'on considère la stigmatisation à l'égard des PVVIH (voir ci-dessus) et des barrières importantes pour le recours aux services de prévention, dépistage et prise en charge du VIH.
- Les lois pénales, les attitudes notamment celles des professionnels de santé, la désinformation, les préjugés et la peur constituent autant de moteurs de la stigmatisation auxquelles il faut s'attaquer afin de promouvoir l'accès aux programmes de lutte contre le VIH et ainsi avoir des bénéfices significatifs en matière de santé à l'échelle du pays.

## Sous-séquence 1.2 : Revenir sur les principes fondamentaux du dépistage

**Durée :** 20 minutes

**Méthode :** En s'appuyant sur la présentation Power Point (PPT) mise à disposition, le formateur revient sur :

- Les principales barrières d'accès aux services de dépistage et comment l'ADVIH y répond de manière complémentaire ;
- Rappel des 5 C ;
- Rappel de la complémentarité de l'ADVIH par rapport au dépistage classique.

**Référentiel technique :**

**Rappel des principales barrières d'accès aux services de dépistage et comment l'ADVIH y répond.**

**En quoi l'autotest réduit les barrières d'accès au dépistage ?**

- Temps
- Volonté de discrétion
- Stigmatisation et discrimination
- Transport (coût et disponibilité)
- Attitudes du personnel de santé
- Peur de connaître son statut
- Deni
- Annonce aux proches
- Accessibilité
- Confidentialité

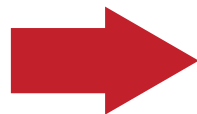

- **Temps**
- **Volonté de discrétion**
- **Stigmatisation et discrimination**
- **Transport (coût et disponibilité)**
- **Attitudes du personnel de santé**
- Peur de connaître son statut
- Deni
- Annonce aux proches
- Accessibilité
- **Confidentialité**

**En résumé, les avantages de l'autotest sont :**

- **Rapide** : donne le résultat en 20 minutes
- **Pratique** : pas besoin de se déplacer en centre de santé
- **Favorise l'autonomisation** (empowerment) des personnes
- **Discrétion** – réduit la peur de la stigmatisation
- **Forte acceptabilité** (population générale et populations-clés)
- **Efficace et fiable**
- Permet de **créer la demande pour le dépistage VIH** chez les populations qui n'ont pas accès aux services actuels
- **N'a pas démontré de conséquences sociales et comportementales négatives** (violences, suicide, comportements à risque)

## Rappel des 5 C

Les « 5 C » sont des principes qui s'appliquent à tous les services de dépistage du VIH, en toutes circonstances. Ces principes sont les suivants :

|   |                                     |                                                                                                                                                                                                                                                                                                                                                                                                                                                                                                                         |
|---|-------------------------------------|-------------------------------------------------------------------------------------------------------------------------------------------------------------------------------------------------------------------------------------------------------------------------------------------------------------------------------------------------------------------------------------------------------------------------------------------------------------------------------------------------------------------------|
| 1 | <b>Consentement</b>                 | Pour qu'un conseil et qu'un dépistage du VIH soient réalisés, les personnes qui en bénéficient doivent donner leur consentement éclairé. Elles doivent être informées du processus suivi pour ce conseil et ce dépistage, ainsi que de leur droit à refuser le test. Il est important d'informer les personnes effectuant un ADVIH que le dépistage obligatoire ou coercitif n'est jamais justifié.                                                                                                                     |
| 2 | <b>Confidentialité</b>              | Le dépistage du VIH doit être confidentiel, ce qui signifie que la teneur des discussions entre le prestataire du dépistage et la personne testée ne sera pas divulguée. Le partage de la confidentialité avec un partenaire ou des membres de la famille (c'est-à-dire avec des personnes de confiance), ainsi qu'avec les prestataires de soins, est souvent très bénéfique pour les personnes vivant avec le VIH.                                                                                                    |
| 3 | <b>Conseil</b>                      | Les services d'information avant le test et de conseil après le test peuvent être dispensés dans le cadre d'un groupe, si la situation s'y prête ; cependant, toutes les personnes doivent avoir la possibilité de poser des questions en privé si elles le souhaitent. Lors de tout dépistage du VIH, la personne testée doit bénéficier de conseils de qualité après le test, adaptés aux résultats obtenus.                                                                                                          |
| 4 | <b>Résultats corrects des tests</b> | Les prestataires des tests de dépistage du VIH doivent s'attacher à fournir des services de dépistage de qualité pour garantir l'exactitude du diagnostic obtenu.                                                                                                                                                                                                                                                                                                                                                       |
| 5 | <b>Connexion</b>                    | La liaison avec les services de prévention, de traitement et de soins doit inclure la prestation d'un suivi efficace et approprié.<br>Dans le cadre de l'auto dépistage du VIH, ce principe de connexion comprend également la liaison avec des services de dépistage permettant de réaliser un nouveau test dans un contexte exempt de stigmatisation, au niveau communautaire ou dans un établissement de soins, où les résultats du dépistage peuvent être confirmés et un diagnostic posé par un prestataire formé. |

### Messages clés pour le formateur :

- Le dépistage du VIH doit toujours être réalisé à titre volontaire, confidentiel et gratuit.
- Tous les services de dépistage du VIH, y compris l'auto dépistage, doivent respecter les « 5 C » définis par l'OMS : Consentement, Confidentialité, Conseil, résultats Corrects et Connexion.
- Il est important d'informer les personnes effectuant un autotest de dépistage du VIH que le dépistage obligatoire ou coercitif n'est jamais justifié.

### Rappel de la complémentarité de l'ADVIH par rapport au dépistage classique

L'OMS a officiellement posé la recommandation suivante : **L'autotest de dépistage du VIH devrait être proposé comme approche supplémentaire aux services de dépistage du VIH.**

**L'ADVIH** complète ainsi les offres de dépistage classique. **Il permet de ce fait d'atteindre des populations qui jusque-là n'avaient pas accès au dépistage** du fait notamment des barrières d'accès à la santé comme la discrimination, la stigmatisation, la distance ou le coût.

**L'ADVIH n'a pas vocation à se substituer aux stratégies de dépistages classiques telles que le dépistage en centre de dépistage volontaire ou au dépistage communautaire en stratégie avancée** (utilisation des TRODs). En effet, ces stratégies sont adaptées, performantes et **sont moins coûteuses pour les pays** (un TROD moins cher qu'un ADVIH oral aujourd'hui)

Ainsi, dans le contexte des pays du projet ATLAS au Mali, l'auto dépistage vise à atteindre prioritairement les **populations clés et les plus difficiles à atteindre.**



### **Sous-séquence 1.3 : Présenter les populations cibles et l'importance du dépistage**

**Durée :** 20 minutes

**Méthode :** En s'appuyant sur la présentation Power Point (PPT) mise à disposition, le formateur procède à un rappel sur l'importance du dépistage auprès des populations cibles du projet ATLAS :

- Populations clés (HSH/TS) et leurs partenaires ;
- Partenaires des PVVIH, les personnes diagnostiquées avec une IST et leurs partenaires.

Le formateur encourage les échanges avec les participants afin de s'assurer que chacun ait bien compris le contenu de cette sous-séquence.

#### **Référentiel technique :**

#### **Rappel sur l'importance du dépistage auprès des populations cibles du projet ATLAS**

Comme mentionné précédemment, des gaps dans l'accès au dépistage existent malgré les progrès effectués ces dernières années en Afrique de l'Ouest et l'ADVIH offre une opportunité unique d'atteindre certaines populations qui ne se dépistent pas à ce jour.

Particulièrement l'accès au service de dépistage pour une large proportion des populations clés à savoir les HSH, les travailleuses du sexe et usagers de drogues est insuffisant alors même que les prévalences VIH parmi ces populations sont importantes.

Ainsi il reste un nombre significatif de personnes vivant avec le VIH parmi ces populations qui ne connaissent pas leur statut, ne se soignent pas et ainsi risquent de contaminer d'autres personnes.

Parmi ces populations, certaines sont plus difficile à atteindre car :

- Elles ne fréquentent pas les services de santé notamment du fait de leur stigmatisation/discrimination ;
- Elles ne fréquentent pas les associations de leur communauté ;
- Elles ne se reconnaissent pas elle-même comme faisant partie des populations clés (exemple : travailleuses du sexe occasionnelles, hommes mariés et ayant des relations sexuelles avec les hommes) ;
- Elles ne se reconnaissent pas à risque d'avoir le VIH.

De plus d'autres populations sont des cibles prioritaires du projet ATLAS car elles présentent un risque d'infection à VIH plus important que la population générale à savoir :

- **Les clients/partenaires des travailleuses du sexe** qui joue un rôle important dans la dynamique de l'épidémie VIH dans la sous-région ;
- **Les partenaires des PVVIH** qui sont à risque significatif d'être séropositifs du fait du statut de leur partenaire ;
- **Les personnes diagnostiquées avec une maladie sexuellement transmissible et leur partenaire** du fait du risque plus élevé d'avoir le VIH (pour rappel le dépistage VIH est une indication médicale en cas d'infection sexuellement transmissible.

**Avant de clôturer la séquence, le formateur demande aux participants s'ils ont des questions et y répond.**

|                               |                                                                                                                                                                                                                                                                                                                                             |
|-------------------------------|---------------------------------------------------------------------------------------------------------------------------------------------------------------------------------------------------------------------------------------------------------------------------------------------------------------------------------------------|
| <b>Séquence n°2</b>           | Les compétences d'écoute active et de conseil.                                                                                                                                                                                                                                                                                              |
| <b>Objectifs pédagogiques</b> | A la fin de cette séquence, les participants auront :<br>- Etabli le lien entre le conseil et la dispensation de kits d'ADVIH dans le projet ATLAS<br>- Compris le principe et l'importance de la posture d'écoute active et de conseil<br>- Simulé la posture d'écoute active et de conseil dans le cas de la dispensation de kits d'ADVIH |
| <b>Durée</b>                  | 1 heure 10 minutes maximum                                                                                                                                                                                                                                                                                                                  |
| <b>Matériel</b>               | Pour réaliser cette séquence, le formateur aura besoin :<br>- Du support de présentation PPT<br>- D'un kit de projection (ordinateur, vidéoprojecteur, écran)<br>- D'un flipchart et de feutres de différentes couleurs (noir, rouge, bleu, vert)<br>- De la version papier des supports pour organiser la simulation                       |

### **Sous-séquence 2.1: Etablir le lien entre le conseil et la dispensation de kits d'ADVIH dans le projet ATLAS**

**Durée :** 15 minutes

**Méthode :** En s'appuyant sur la présentation Power Point (PPT) mise à disposition, le formateur expose le lien entre le conseil et la dispensation de kits d'ADVIH dans le projet ATLAS :

- Le conseil dans le cas d'une dispensation primaire assistée (professionnels de la santé, pairs éducateurs et écoutants à distance) ;
- Le conseil dans le cas d'une dispensation non assistée (la personne fera le test chez elle) ou pour la distribution secondaire (professionnels de la santé et pairs éducateurs).

#### **Référentiel technique :**

L'ADVIH, par sa nature, ne donne pas systématiquement la possibilité de faire un conseil pré et post dépistage complet comme cela est fait dans un centre ou lors d'un dépistage communautaire (dépistage assisté avant, pendant et après). En effet, si la possibilité d'accompagner la personne existe dans le processus de dépistage (et doit être proposée à la personne comme une option), le TROD sera prioritairement proposé dans ce cadre (Cf. complémentarité ci-dessus).

Ainsi dans la plupart des cas la dispensation se fera avec un conseil en amont du dépistage visant à ce que la personne soit capable de réaliser seule, chez elle, l'auto dépistage.

De surcroit, la principale stratégie de dispensation du projet est secondaire (partenaires/pairs/clients) pour laquelle le conseil ne sera pas apporté par le professionnel de la santé ou le pair éducateur mais par la personne à qui le kit d'ADVIH sera remis (notion de distributeur primaire/relai, cf. canaux de dispensation).

Il y a donc deux types d'approches pour apporter conseil à l'utilisateur de kits d'ADVIH :

- **Le conseil dans le cas d'une dispensation primaire assistée** (professionnels de la santé, pairs éducateurs et écoutants à distance) qui sera similaire au conseil avant et après tout dépistage du VIH ;
- **Le conseil dans le cas d'une dispensation non assistée** (la personne fera le test chez elle) ou pour la distribution secondaire (professionnels de la santé et pairs éducateurs) qui sera adapté et se concentrera sur le conseil en amont du dépistage. Il est cependant fortement recommandé de proposer à tout usager dans ce cas de ne pas hésiter à solliciter un soutien lorsqu'il aura effectué son auto dépistage.

Dans les deux cas, le professionnel de la santé, le pair éducateur ou l'écouter de la ligne téléphonique devront démontrer des qualités d'écoute et de conseil.

## **Sous-séquence 2.2 : Présenter la posture d'écoute active et de conseil**

**Durée :** 15 minutes

**Méthode :** En s'appuyant sur le référentiel technique mise à disposition et le flipchart :

- Le formateur demande aux participants ce qu'ils connaissent de la posture d'écoute active et de la posture de conseil, leurs différences ;
- Le formateur note les réponses et apporte les éléments complémentaires si nécessaires.

**Référentiel technique :**

### **Éléments pour compléter le brainstorming**

Les qualités du conseil de dépistage :

- *L'écoute (regarder la personne dans les yeux, encourager la personne à parler, communication non verbale) ;*
- *L'empathie (reformulation des propos, être attentif aux signaux non verbaux, poser des questions ouvertes) ;*
- *L'authenticité (être honnête, être soi-même, être à l'aise) ;*
- *L'acceptation inconditionnelle de l'autre (zéro jugement, être attentionné, ne pas contredire, ...) ;*
- *La qualité de la présence (être concret et concentré, ce qui se joue c'est ici et maintenant, poser des questions) ;*
- *La capacité à faciliter l'expression des ressentis du patient (accompagner les émotions) ;*
- *La capacité à donner de nouvelles perspectives (apporter des faits et des données qui permettent au patient de se projeter).*

Le lien avec l'ADVIH :

- *Ces qualités de conseil sont utilisées dans les tests de dépistage rapide s'appliquent dans le cadre de réalisation avec l'ADVIH ;*
- *Cependant, on verra par la suite de la formation que l'ADVIH n'est pas nécessairement dans une logique de dispensation assistée, le conseil sera différent et adapté au besoin.*

Les principales qualités du conseil pour la dispensation d'un ADVIH (qu'elle soit assistée ou non assistée) :

- *Soyez à l'écoute, non discriminant/stigmatisant et sans jugement de la personne à qui vous vous adressez quel que soit sa situation ;*
- *Basez-vous sur les besoins, les ressources et les préférences de la personne, laissez-la exprimer ses besoins et ressentis ;*
- *Répondez aux questions honnêtement ;*
- *Soyez structuré dans vos réponses, facilitez la communication et l'échange ;*
- *Reconnaissez que le changement de comportement n'est pas simple et que les personnes ne sont jamais parfaites ;*
- *Soyez positifs et stimulez les questions ;*
- *Soyez dans une posture de soutien à la personne.*

### **Sous-séquence 2.3 : Simuler la posture d'écoute active et de conseil dans le cas de la dispensation de kits d'ADVIH**

**Durée :** 35 minutes

**Méthode :** En s'appuyant sur le référentiel technique mise à disposition et le flipchart et le support papier des simulation (1 support par participant) :

- Le formateur distribue à l'ensemble des participants les la fiche de simulations. Le formateur lit la partie consigne, demande si l'ensemble des participants a compris, si des questions demeurent il y répond.
- Simulation, situation de pré-conseil, avant le dépistage :
  - Le formateur invite un binôme au centre de la salle pour pratiquer la première simulation. Il lit le scénario de la première simulation, demande si l'ensemble des participants a compris, si des questions demeurent il y répond ;
  - Le formateur rappelle que les autres participants, les observateurs, doivent se référer aux « champs d'observations » pour formuler leurs remarques ;
  - Les autres participants observent la simulation et notent leurs commentaires sur un carnet pour en discuter après.
- Débriefing de la simulation : le formateur demande aux observateurs ce qu'ils ont pu noter comme bonne pratique et/ou erreurs commises par les participants en fonction des champs d'observation. Il note les principales observations.
- Le formateur procède à la synthèse. Il résume les principaux apprentissages issus des deux débriefings, ce sont les points d'apprentissage à retenir.

**Avant de clôturer la séquence, le formateur demande aux participants s'ils ont des questions et y répond.**

|                               |                                                                                                                                                                                                                                                                                                           |
|-------------------------------|-----------------------------------------------------------------------------------------------------------------------------------------------------------------------------------------------------------------------------------------------------------------------------------------------------------|
| <b>Séquence n°3</b>           | Les spécificités de dispensation de kits d'ADVIH dans le projet ATLAS.                                                                                                                                                                                                                                    |
| <b>Objectifs pédagogiques</b> | A la fin de cette séquence, les participants auront :<br>- Compris les spécificités de la dispensation de kits d'ADVIH dans le projet ATLAS<br>- Compris les aspects éthiques et les implications propres à la notification<br>- Compris les différentes modalités de dispensation ATLAS dans la pratique |
| <b>Durée</b>                  | 1 heure et 15 minutes maximum                                                                                                                                                                                                                                                                             |
| <b>Matériel</b>               | Pour réaliser cette séquence, le formateur aura besoin :<br>- Du support de présentation PPT<br>- D'un kit de projection (ordinateur, vidéoprojecteur, écran)                                                                                                                                             |

### **Sous-séquence 3.1 : Introduire aux spécificités de dispensation de kits d'ADVIH**

**Durée :** 10 minutes

**Méthode :** En s'appuyant sur la présentation Power Point (PPT) mise à disposition, le formateur réalise une présentation sur l'introduction aux spécificités des modalités de dispensation de kits d'ADVIH dans le projet ATLAS.

#### **Référentiel technique :**

Au-delà du conseil associé à la dispensation de kits d'ADVIH, il est important de prendre en considération pour les professionnels de la santé et les pairs éducateurs certaines spécificités liées au canal de dispensation (4 canaux). Dans le cadre du projet ATLAS au Mali, 2 grandes spécificités sont à noter :

- **Le dépistage des cas index** (1<sup>er</sup> canal du schéma présenté préalablement) qui implique un accompagnement spécifique des PVVIH et des enjeux liés à la notification des partenaires ;
- **Le dépistage basé sur la distribution secondaire** pour lequel l'utilisateur de kits d'ADVIH ne sera pas la personne conseillée au moment de la dispensation. Ce sera le cas avec les canaux suivants : partenaires des PVVIH (au-delà des enjeux de la notification), partenaires des personnes ayant une IST, partenaires/pairs/clients des populations clés ciblées.

Au-delà des spécificités de dispensation mentionnées, il est important de présenter le rôle des écoutants des lignes téléphonique nationales qui, eux interviendront auprès de n'importe quel usager, avant, pendant ou après le dépistage.

### **Sous-séquence 3.2 : Les aspects éthiques et les implications propres à la notification**

**Durée :** 30 minutes

#### **Méthode :**

- Les participants se répartissent en groupe de 3 ou 4 personnes ;
- En groupe, ils réalisent un brainstorming et note leurs réponses relatives aux questions suivantes :
  - Quelles sont les aspects éthiques à prendre en compte lors de l'offre de l'ADVIH à un partenaire et lors de la notification de son statut ?
  - Quels sont les implications de la notification ?
- Les participants restituent leurs réflexions, le formateur note les réponses des participants pour chaque question et procède à une synthèse.

En s'appuyant sur la présentation Power Point (PPT), le formateur réalise une présentation ...

- La notification des partenaires PVVIH, ses implications et sa mise en œuvre dans le cadre du projet ATLAS ;
- Exemples de stratégies pour la notification dans le projet ATLAS.

## Référentiel technique :

### La notification des partenaires de PVVIH, ses implications et sa mise en œuvre dans le cadre du projet ATLAS

#### Notification du partenaire : quelques définitions

- **Notification passive** : un prestataire formé incite les personnes vivant avec le VIH à divulguer elles-mêmes leur statut à leurs partenaires sexuels ou à leurs partenaires d'injection de drogues, et à suggérer également à ceux-ci de se faire dépister pour le VIH étant donné leur exposition potentielle à l'infection.
- **Notification assistée des partenaires** : un prestataire formé aide des cas index (qui ont signifié leur consentement) à divulguer leur statut ou à notifier anonymement leur exposition à l'infection à VIH à leur(s) partenaire(s) sexuel(s). Le prestataire propose ensuite un dépistage du VIH à ce(s) partenaire(s). La notification assistée des partenaires est effectuée dans le cadre d'une notification par le prestataire, contractuelle ou double.
  - **Notification contractuelle** : la PVVIH a passé avec un prestataire formé un contrat selon lequel il orientera son (ses) partenaire (s) vers des services de dépistage du VIH dans un délai convenu. Une fois celui-ci dépassé, le prestataire contacte le(s) partenaire (s) directement et lui (leur) propose un dépistage volontaire du VIH.
  - **Notification par le prestataire** : avec le consentement de la PVVIH, le prestataire qualifié prend confidentiellement contact avec le(s) partenaire(s) de cette personne et lui (leur) propose un dépistage volontaire du VIH.
  - **Notification double** : le prestataire formé accompagne les PVVIH lorsqu'elles révèlent leur statut à leurs partenaires. Il propose également un dépistage volontaire du VIH à ceux-ci.

#### Objectifs et cadre de la notification dans le projet ATLAS :

- Atteindre les personnes infectées par le VIH et non diagnostiquées qui ont une probabilité accrue d'être séropositives pour le VIH, plus particulièrement les partenaires sexuels des personnes vivant avec le VIH (notion de cas index).

Note pour les participants : Dans le cadre du projet ATLAS au Mali, les partenaires d'autres populations sont ciblées à savoir

- Les partenaires des patients diagnostiqués avec une IST
- Les partenaires des populations clés

Nous ne sommes pas dans le cadre de la notification/cas index même si les enjeux peuvent être similaires dans la dynamique et les implications puisqu'il s'agit pour la personne ciblée d'annoncer à son partenaire qu'il a été diagnostiqué avec une IST ou de l'inviter à se dépister.

La loi VIH et les stratégies VIH du Mali inscrivent la notification des partenaires des personnes vivant avec le VIH comme une pratique recommandée/obligatoire.

#### Les avantages de la notification assistée :

- La notification assistée des partenaires est un moyen simple et efficace d'atteindre ces personnes qui, bien souvent, ne sont ni diagnostiquées, ni conscientes de leur exposition au VIH et pourraient accueillir positivement un soutien et la possibilité de se faire dépister pour le VIH.
- Depuis des décennies, la notification assistée des partenaires est une importante approche de santé publique pour la prise en charge des maladies infectieuses, notamment dans les programmes de lutte contre les IST et la tuberculose, mais elle n'a pas été systématiquement appliquée pour les personnes vivant avec le VIH.
- La notification assistée des partenaires peut :
  - Renforcer le recours aux services de dépistage du VIH des partenaires des personnes vivant avec le VIH.

- Augmenter la proportion de nouveaux cas diagnostiqués chez les personnes vivant avec le VIH.
- Orienter davantage de partenaires de personnes vivant avec le VIH vers les services de traitement et de soins.
- La notification assistée des partenaires améliore le recours au dépistage du VIH et permet, par rapport à l'orientation passive, d'établir davantage de nouveaux diagnostics dans la population vivant avec le VIH. Cela étant, l'orientation passive peut, elle aussi, inciter les partenaires des personnes vivant avec le VIH à se faire dépister.
- Le(s) partenaire(s) ne devrai(en)t être notifié(s) qu'avec le consentement de la PVVIH, et être la (les) seule(s) personne(s) avertie(s).
- Le dépistage du VIH chez les partenaires et au sein des couples présente d'autres avantages :
  - Soutien mutuel pour l'accès aux services de prévention, de traitement et de soins du VIH ;
  - Amélioration de l'observance et de la poursuite du traitement antirétroviral ;
  - Appui renforcé pour la prévention de la transmission de la mère à l'enfant ;
  - Priorité donnée à la prévention efficace du VIH chez les couples séro-discordants (utilisation du préservatif, traitement antirétroviral et prophylaxie post exposition chez les partenaires négatifs pour le VIH).

Les préférences concernant la méthode de notification du partenaire varient selon la population, l'âge (notamment chez les jeunes) et le type de partenaire (principal ou occasionnel).

La notification assistée du partenaire peut prendre différentes formes : conversation en face à face, lettre, appel téléphonique, message texte (SMS), vidéo, courriel et système de messagerie Internet. Il faut veiller à ce que la bonne personne reçoive le message et à préserver l'anonymat du patient vivant avec le VIH et du partenaire notifié.

### Approches de l'offre de services de notification aux partenaires pour le VIH

| Services de notification assistée aux partenaires (notification par le prestataire, notification contractuelle ou notification double)                                                                                                                                                                                                                                                                                                                                                                                                                                                                                                                      | Services de notification passive des partenaires                                                                                                                                                                                                                                                                                                                                                                                                                                                                                                                                                                                                                                                                      |
|-------------------------------------------------------------------------------------------------------------------------------------------------------------------------------------------------------------------------------------------------------------------------------------------------------------------------------------------------------------------------------------------------------------------------------------------------------------------------------------------------------------------------------------------------------------------------------------------------------------------------------------------------------------|-----------------------------------------------------------------------------------------------------------------------------------------------------------------------------------------------------------------------------------------------------------------------------------------------------------------------------------------------------------------------------------------------------------------------------------------------------------------------------------------------------------------------------------------------------------------------------------------------------------------------------------------------------------------------------------------------------------------------|
| <ul style="list-style-type: none"> <li>- Le prestataire donne des conseils et propose une assistance aux PVVIH pour la divulgation et la notification à leurs partenaires de leur statut sérologique en employant l'une des trois méthodes de notification.</li> <li>- Le prestataire contacte les partenaires par téléphone, Internet, courriel ou visite à domicile pour les informer de leur exposition potentielle à une infection par le VIH et leur propose des services de dépistage du VIH.</li> <li>- Le prestataire offre des services de dépistage du VIH à domicile pour l'ensemble du foyer (partenaires et membres de la famille).</li> </ul> | <ul style="list-style-type: none"> <li>- Le prestataire donne des conseils et encourage les PVVIH à divulguer leur statut sérologique à leurs partenaires et à les informer de leur exposition possible au VIH, soit en personne, soit par téléphone, SMS, courriel, etc.</li> <li>- Le prestataire remet aux PVVIH une lettre ou une fiche invitant leurs partenaires à se rendre dans un établissement de santé. Quand les partenaires se présentent à l'établissement de santé, des services de dépistage du VIH leur sont proposés.</li> <li>- Les PVVIH peuvent recourir à des services de messagerie anonyme, comme le téléphone, le courriel ou Internet pour informer eux-mêmes leurs partenaires.</li> </ul> |

### La notification du partenaire et conséquences dommageables

- **Les essais contrôlés randomisés et les études d'observation ont rapporté peu d'exemples de conséquences** dommageables consécutives à une notification passive ou assistée des partenaires dès lors qu'elle respecte le principe de consentement de la PVVIH.
- **La confidentialité et la participation volontaire sont des principes essentiels**, en particulier au cas où les partenaires ne se sont pas encore mutuellement révélés leur statut VIH.
- **Les responsables de la mise en œuvre de la notification doivent être conscients des conséquences dommageables possibles d'une divulgation du statut VIH**, mais il faut aussi considérer les avantages du diagnostic précoce et de l'orientation vers le traitement des personnes séropositives pour le VIH.

- **Ceux qui proposent des services de notification du partenaire doivent discuter des risques de conséquences dommageables avec les patients recevant un diagnostic de VIH.** Si la sécurité du patient n'est pas menacée, des services de notification volontaire du partenaire doivent être proposés.

### Facteurs de succès

- **Manière de discuter par les professionnels de santé** des partenaires sexuels sans porter de jugement, à la manière de faciliter la divulgation mutuelle pour les couples et aux moyens de localiser les partenaires occasionnels. Pour suivre les résultats, il faut que les tentatives de notification des partenaires, le recours au dépistage du VIH, les résultats des tests et l'orientation vers les soins des partenaires soient consignés dans les dossiers sur les patients index.
- **Offrir un choix.** Différentes possibilités de notification du partenaire doivent être laissées au choix de la PVVIH (qui doit également pouvoir refuser cette possibilité). Par exemple, un sujet vivant avec le VIH peut souhaiter employer une approche passive pour certains partenaires, qu'il se sent prêt à avertir lui-même, et préférer que ce soit le prestataire qui prenne contact avec d'autres.
- **Proposer périodiquement la notification des partenaires.** À partir du moment où l'infection à VIH est décelée, une notification assistée des partenaires peut être proposée à différents moments, tout au long du parcours du patient dans le système de santé. Les évaluations peuvent être répétées lors des visites de suivi semestrielles ou annuelles, car la propension de la personne à consentir aux services de notification des partenaires peut évoluer au fil du temps.
- **Ne pas pratiquer de notifications obligatoires ou coercitives et éviter les attitudes et comportements qui stigmatisent et discriminent** les personnes issues de groupes de population clés et les personnes vivant avec le VIH.

### Messages clés pour le formateur :

- La notification des partenaires des PVVIH peut être faite de manière passive (sans aide) ou assistée (avec aide du professionnel de santé).
- La notification assistée des partenaires améliore le recours au dépistage et est un moyen simple et efficace d'atteindre les partenaires des PVVIH. Les études d'observation ont rapporté peu d'exemples de conséquences dommageables consécutives à une notification passive ou assistée des partenaires.
- La confidentialité et la participation volontaire sont des principes essentiels, en particulier au cas où les partenaires ne se sont pas encore mutuellement révélés leur statut VIH.
- Il faut offrir le choix à la PVVIH des possibilités de notification et la proposer périodiquement si elle n'est pas prête au moment de la découverte de son statut.
- Il ne faut pas pratiquer de notification obligatoires ou coercitives sans consentement de la PVVIH et éviter les attitudes et comportements qui stigmatisent et discriminent.

### Exemples de stratégies pour la notification dans le projet ATLAS

Dans le cadre du projet ATLAS, plusieurs méthodes de notification seront utilisées. En voici quelques exemples :

**Notification passive** par manque d'outils/ressources (crédit téléphone, internet, visites à domicile etc...) mais qui peut cependant s'avérer efficace si elle est correctement conduite par les professionnels de la santé.

**Notification assistée et plus particulièrement double** avec l'accompagnement de la personne vivant avec le VIH au domicile quand elle en ressent le besoin. Certains partenaires s'appuieront en effet sur les réseaux communautaires existants (médiateurs PVVIH, agents d'associations communautaires) afin d'accompagner la personne et ainsi proposer l'ADVIH comme moyen de dépistage si tant est que le, la partenaire ne désire pas se rendre au centre de dépistage.



### **Sous-séquence 3.3 : Présenter les différentes modalités de dispensation ATLAS dans la pratique**

**Durée :** 20 minutes

**Méthode :** En s'appuyant sur la présentation Power Point (PPT) mise à disposition, le formateur réalise une présentation sur les spécificités de la dispensation ATLAS dans la pratique :

- Partenaires PVVIH ;
- Cas IST et partenaires.

**Référentiel technique :**

#### **Dépistage des Cas Index : Distribution secondaire pour les partenaires des PVVIH**

Comme nous venons de le voir précédemment il s'agira, à travers les consultations ARV où la PTME, pour les professionnels de santé, d'accompagner la PVVIH afin de dépister son/sa/ses partenaire.s en proposant notamment l'ADVIH (dans le cas où les partenaires ne désirent pas venir jusqu'au centre pour se dépister)

**Important :** la PVVIH n'est pas bénéficiaire de l'ADVIH (elle connaît son statut et risque si elle est sous ARV d'avoir un résultat faux négatif).

**Important :** Modalités concrètes : en fonction des contextes, notification passive ou assistée/double

- **Dans le cas d'une notification passive**, le professionnel de la santé pourra/devra suivre auprès de la PVVIH si le/la/les partenaire.s a utilisé l'ADVIH lors d'une consultation ultérieure et s'assurer que si le résultat était réactif, le lien vers le test de confirmation est fait.
- **Dans le cas d'une notification assistée/double**, de la même manière, le professionnel de la santé pourra suivre auprès de la PVVIH si le/la/les partenaire.s a utilisé l'ADVIH lors d'une consultation ultérieure (l'ADVIH ne sera pas nécessairement fait au moment de la notification) ou s'appuiera sur les potentiels réseaux communautaires existants.

#### **Dépistage lors des consultations IST : distribution secondaire pour les partenaires des personnes diagnostiquées avec une IST mais aussi une offre alternative pour le patient ayant une IST (distribution primaire)**

Lors d'une consultation, le professionnel de la santé doit proposer à la personne diagnostiquée avec une IST un dépistage du VIH (c'est une indication médicale car le risque de séropositivité est plus élevé).

- En général le dépistage se fait au sein du centre dans lequel la consultation IST est effectuée et l'offre de dépistage se fait donc dans le centre de santé.
- L'ADVIH ici vise essentiellement à offrir l'opportunité pour le partenaire de la personne ayant une IST à se dépister. La cible première est donc le partenaire.
- Le conseil apporté expliquera donc l'importance pour le partenaire d'effectuer aussi un dépistage VIH et reprendra l'ensemble des messages clés afin de s'assurer que le patient soit en capacité de proposer l'ADVIH à son partenaire qui sera en mesure de réaliser correctement le test, d'interpréter son résultat et de s'orienter, en fonction de celui-ci vers les services adaptés.
- La promotion des outils disponibles telles la notice, la brochure complémentaire, la vidéo de démonstration et la ligne téléphonique nationale est essentielle.

Dans le cas où la personne présente à la consultation et diagnostiquée avec une IST ne désire pas faire le dépistage dans le centre, l'ADVIH peut lui être proposé afin qu'elle se dépiste chez elle (avec le partenaire).

Concrètement, il y a la possibilité de donner 1 ADVIH pour le/la partenaire de la personne diagnostiquée avec une IST ou 2 kits d'ADVIH pour le/la partenaire et le/la patient.e

**Avant de clôturer la séquence, le formateur demande aux participants s'ils ont des questions et y répond.**

|                               |                                                                                                                                                                                                    |
|-------------------------------|----------------------------------------------------------------------------------------------------------------------------------------------------------------------------------------------------|
| <b>Séquence n°4</b>           | L'importance et les défis du lien vers la confirmation et l'entrée dans les soins.                                                                                                                 |
| <b>Objectifs pédagogiques</b> | A la fin de cette séquence, les participants auront :<br>– Compris l'objectif final derrière l'acte de dépistage, à savoir l'importance d'aller confirmer le diagnostic et commencer un traitement |
| <b>Durée</b>                  | 25 minutes maximum                                                                                                                                                                                 |
| <b>Matériel</b>               | Pour réaliser cette séquence, le formateur aura besoin :<br>– Du support de présentation PPT<br>– D'un kit de projection (ordinateur, vidéoprojecteur, écran)                                      |

#### **Sous-séquence 4.1 : Expliquer l'objectif final derrière l'acte de dépistage : aller confirmer le diagnostic et commencer un traitement**

**Durée :** 25 minutes

**Méthode :** En s'appuyant sur la présentation Power Point (PPT) mise à disposition, le formateur réalise un exposé sur :

- L'importance et les défis du lien vers la confirmation et l'entrée dans les soins ;
- Les bénéfices du lien vers la confirmation et l'entrée dans les soins pour la personne avec un ADVIH réactif ;
- Barrières existantes pour assurer l'entrée dans les soins dans le cadre de l'ADVIH et stratégies/outils pour les surmonter.

#### **Référentiel technique :**

Comme déjà souligné, l'ADVIH facilite le recours au dépistage mais cela n'est pas une finalité en soi. En effet, il est crucial qu'une fois l'auto dépistage réalisé par la personne et au regard du résultat, elle puisse s'orienter vers les services adaptés à sa situation.

Plus particulièrement, lorsque le résultat est réactif, il est indispensable que la personne confirme son statut avec un test supplémentaire et entre dans les soins.

#### **IMPORTANT :**

C'est uniquement dans ce cas que le bénéfice du dépistage/de l'auto dépistage est réel car la personne qui connaît son statut de manière précoce, a accès aux soins et observe son traitement verra sa charge virale fortement réduite voire indétectable.

La personne sera ainsi en meilleure santé et représentera un risque significativement moindre voire nul de contaminer d'autres personnes.

#### **Les bénéfices du lien vers la confirmation et l'entrée dans les soins pour l'utilisateur avec un kit d'ADVIH réactif**

Ces bénéfices peuvent être mis en avant par les professionnels de la santé, les pairs éducateurs et les écoutants peuvent promouvoir le recours au test de confirmation et l'entrée dans les soins :

- La personne avec un kit d'ADVIH réactif est peut-être séropositive. Un test supplémentaire est nécessaire pour confirmer le statut. Ne pas y recourir maintient la personne dans le doute et la crainte de son statut ;
- La personne, lorsque le test est confirmé :
  - Est alors capable de prendre des décisions éclairées sur sa vie
  - Bénéficie de conseils et de soutien émotionnel/psychosocial
  - Bénéficie d'un accompagnement pour accepter sa situation et en parler avec ses proches
  - A accès au traitement ARV qui améliore sa qualité de vie
  - Réduit son risque de contaminer d'autres personnes

## **Barrières existantes pour assurer l'entrée dans les soins dans le cadre de l'ADVIH et stratégies/outils pour les surmonter**

Deux barrières principales pour promouvoir le lien vers le test de confirmation et l'entrée dans les soins après une auto dépistage réactif existent :

- Dans le cas d'auto dépistage réalisé par une personne seule à la maison, le conseil après le dépistage qui permet d'accompagner la personne et d'expliquer l'importance du test de confirmation et de l'entrée dans les soins ne peut être réalisé (sauf si celle-ci a recours à la ligne téléphonique gratuite) ;
- Les phénomènes de stigmatisation et discrimination, barrières d'accès aux services de santé et présentés précédemment s'appliquent nécessairement puisque le test de confirmation devra se faire en centre de dépistage/santé.

Ces deux éléments devront être ainsi pris en compte lors de la dispensation de kits d'ADVIH par les professionnels de santé, les pairs éducateurs et les écoutants de la ligne téléphonique gratuite :

- En insistant sur l'importance du lien vers le test de confirmation et les bénéfices pour la personne au moment de la dispensation et en sensibilisant les distributeurs relai (pour la distribution secondaire) de passer ce message aux usagers secondaires ;
- En ayant soi-même une attitude non stigmatisante/discriminante au moment de la dispensation de kits d'ADVIH ;
- En dispensant les kits d'ADVIH en respect des règles d'écoute active et de conseil abordées précédemment ;
- En faisant la promotion des outils à disposition (notice, brochure complémentaire, vidéo de démonstration) qui rappelle l'importance d'effectuer un test de confirmation ;
- En rappelant que sur la brochure complémentaire et sur le site internet ATLAS, une liste de services est disponible ;
- Pour les professionnels de santé et éducateurs pairs, en invitant systématiquement la personne à appeler la ligne téléphonique pour se faire aider et accompagner ;
- Pour les professionnels de santé et éducateurs pairs, en proposant d'être contacté par la personne après le résultat s'il s'avère réactif ou s'appuyer sur les éventuels réseaux communautaires existants.

**Avant de clôturer la séquence, le formateur demande aux participants s'ils ont des questions et y répond.**

|                               |                                                                                                                                                                                                                                                                                                    |
|-------------------------------|----------------------------------------------------------------------------------------------------------------------------------------------------------------------------------------------------------------------------------------------------------------------------------------------------|
| <b>Séquence n°5</b>           | Conseil et messages associés à la dispensation non-assistée de kits d'ADVIH.                                                                                                                                                                                                                       |
| <b>Objectifs pédagogiques</b> | A la fin de cette séquence, les participants auront :<br>- Revu les messages clés à transmettre lors de la dispensation de kits d'ADVIH<br>- Compris les caractéristiques spécifiques de la dispensation non-assistée en présentiel ou à distance, par une mise en situation lors d'un jeu de rôle |
| <b>Durée</b>                  | 55 minutes maximum                                                                                                                                                                                                                                                                                 |
| <b>Matériel</b>               | Pour réaliser cette séquence, le formateur aura besoin :<br>- D'un flipchart et de feutres de différentes couleurs (noir, rouge, bleu, vert)<br>- De la version papier de la fiche pratique « Messages clés »<br>- De la version papier du support pour organiser les jeux de rôle n°1 et n°2      |

### **Sous-séquence 5.1 : Rappeler les messages clés**

**Durée :** 5 minutes

**Méthode :** En s'appuyant sur le référentiel technique et la fiche pratique « Messages clés », le formateur rappelle les messages clés vu lors du module 2 et annonce le jeu de rôle à suivre.

### **Sous-séquence 5.2 : Présenter les consignes**

**Durée :** 10 minutes

**Méthode :** En s'appuyant sur le support « jeu de rôle mis à disposition », le formateur présente les règles :

- L'ensemble des participants se répartissent en binômes (A) et (B) ;
- Le formateur distribue aux participants la fiche pratique « messages clés de dispensation » et le script propres au jeu de rôle. Ce script précise le scénario à suivre ;
- Le formateur demande aux participants s'ils ont des questions de compréhension.

### **Sous-séquence 5.3 : Mettre en exergue les caractéristiques spécifiques de la dispensation non-assistée**

**Durée :** 35 minutes

**Méthode :** En s'appuyant sur le support « jeu de rôle », et la fiche pratique « Messages clés » mis à disposition, les participants réalisent le jeu de rôle :

- Un participant joue (A) et un autre (B) pendant une dizaine de minutes ;
- A l'issue de ce premier jeu, le binôme intervertit les rôles pour un deuxième jeu d'une dizaine de minute : (A) devient (B) et vice-versa ;
- A l'issue du jeu de rôles, le formateur demande aux binômes les points d'apprentissage ;
- Le formateur note les réponses au fur et à mesure et procède à la synthèse des enseignements généraux et des recommandations à mémoriser.

**Avant de clôturer la séquence, le formateur demande aux participants s'ils ont des questions et y répond.**

|                               |                                                                                                                                                                                                                                                               |
|-------------------------------|---------------------------------------------------------------------------------------------------------------------------------------------------------------------------------------------------------------------------------------------------------------|
| <b>Séquence n°6</b>           | Les outils de suivi-évaluation.                                                                                                                                                                                                                               |
| <b>Objectifs pédagogiques</b> | A la fin de cette séquence, les participants auront :<br>– Compris et expérimenté l’outil de suivi-évaluation                                                                                                                                                 |
| <b>Durée</b>                  | 40 minutes maximum                                                                                                                                                                                                                                            |
| <b>Matériel</b>               | Pour réaliser cette séquence, le formateur aura besoin :<br>– Du support de présentation PPT<br>– D’un kit de projection (ordinateur, vidéoprojecteur, écran)<br>– Des supports papiers de l’outil de suivi-évaluation (1 exemplaire pour chaque participant) |

### **Sous-séquence 6.1 : Présenter les différents outils**

**Durée :** 15 minutes

**Méthode :** En s’appuyant sur la présentation Power Point (PPT) et des supports papiers de chaque outil de suivi-évaluation mis à disposition, le formateur effectue une présentation sur :

- Les principes et objectifs du suivi évaluation ATLAS : recherche à visée évaluative et intégration au système de santé ;
- Que cherche-t-on à suivre et évaluer : spécificités du projet ATLAS ;
- La collecte de routine par l’écouteur hotline :
  - Pourquoi ?
  - Qui collecte quoi ? Présentation des outils
  - Quand / A quelle fréquence
- Comment (présentation des trois catégories d’outils).

**Référentiel technique :**

#### **Les principes et objectifs du suivi évaluation ATLAS**

Le suivi évaluation est un processus qui permet de suivre, évaluer et d’améliorer la performance et l’impact du projet. Il permet ainsi d’atteindre les objectifs du projet.

Dans le cadre du projet ATLAS plusieurs méthodes de suivi et d’évaluation de la performance et de l’impact ont été développées :

- **La recherche à visée évaluative** qui comprend plusieurs volets :
  - 2 volets qualitatifs mesurant les facteurs et les impacts sociaux auprès des populations clés et les personnes vivant avec le VIH ;
  - 1 enquête téléphonique qui mesure l’efficacité et l’impact de l’ADVIH auprès des usagers et usagers ;
  - 1 volet mesurant les coûts et modélisant le coût efficacité de l’introduction de l’ADVIH afin de permettre au Mali d’envisager la mise à l’échelle.
- **La collecte de données permettant d’évaluer indirectement la performance et l’impact** du projet notamment les données de dépistage et d’entrée dans les soins dans les districts où le projet ATLAS est déployé et en les comparant à d’autres districts où l’ADVIH n’est pas disponible.
- **La collecte de données de routine permettant de suivre et d’évaluer la dispensation de kits d’ADVIH** et ainsi d’améliorer en continu les stratégies déployées. Ces données peuvent être qualitatives comme les entretiens réguliers avec les professionnels de la santé et les pairs éducateurs pour avoir un retour sur leurs pratiques ou quantitatives afin de mesurer l’évolution des dispensations.

C’est dans ce dernier cas que des outils ont été spécifiquement développés pour les professionnels de la santé.

Il est important de noter que dans le cadre du projet ATLAS, de par la nature et l'esprit de l'ADVIH (faire le test chez soi) et les populations ciblées (distribution secondaire visant les partenaires et les populations cachées), **il n'est pas demandé pour les professionnels de la santé et les pairs éducateurs de collecter les données de résultats des tests effectués par les personnes** (d'autres méthodes évalueront cet aspect). **Seules les données liées à la dispensation (au distributeur primaire) seront demandées.**

### La collecte de routine par les professionnels de santé

| Méthode                                                                                                                                                                                                                                                                                             | Quoi                                                                                                                                                                                                                                                                                                                                                                                                                                                                                                                         | Support                      |
|-----------------------------------------------------------------------------------------------------------------------------------------------------------------------------------------------------------------------------------------------------------------------------------------------------|------------------------------------------------------------------------------------------------------------------------------------------------------------------------------------------------------------------------------------------------------------------------------------------------------------------------------------------------------------------------------------------------------------------------------------------------------------------------------------------------------------------------------|------------------------------|
| <b>Pour les consultations IST, dans des consultations ouvertes à la population générale,</b> les données seront collectées dans les registres de consultation habituels par les professionnels de la santé et agrégées mensuellement dans l'outil/rapport                                           | <ul style="list-style-type: none"> <li>- Nombre de personnes reçues en consultation et/ou ayant bénéficié de soins/traitement pour IST selon l'âge et le sexe</li> <li>- Nombre de personnes ayant effectué un TDR VIH classique volontairement ou sur proposition du prestataire</li> <li>- Nombre de personnes ayant reçu un autotest VIH sur demande ou sur proposition du prestataire</li> <li>- Nombre de kits d'ADVIH dispensés par le prestataire aux personnes ayant des IST par classe d'âge et par sexe</li> </ul> | Fiche « Consultations IST »  |
| <b>Pour les consultations PVVIH dans des centres ouverts à la population générale ou dans des centres dédiés aux populations clés,</b> les données seront collectées dans les registres de consultation habituels par les professionnels de la santé et agrégées mensuellement dans l'outil/rapport | <ul style="list-style-type: none"> <li>- Nombre de personnes vivant avec le VIH sous ARV suivies dans la structure selon l'âge et le sexe</li> <li>- Nombre de kits d'ADVIH dispensés aux Personnes vivant avec le VIH sous ARV suivies dans la structure par âge et par sexe, pour leur (s) partenaire (s)</li> </ul>                                                                                                                                                                                                       | Fiche « Sites ARV »          |
| <b>Pour les consultations IST/PVVIH dédiées aux populations clés (stratégies fixes)</b> les données seront collectées dans les registres de consultation habituels par les professionnels de la santé et agrégées mensuellement dans l'outil/rapport                                                | <b>Pour les HSH :</b> <ul style="list-style-type: none"> <li>- Nombre de HSH reçus en consultation IST au niveau de la clinique selon l'âge</li> <li>- Nombre de kits d'ADVIH dispensés aux HSH lors des consultations IST selon l'âge</li> </ul>                                                                                                                                                                                                                                                                            | Fiche « Stratégie fixe HSH » |
|                                                                                                                                                                                                                                                                                                     | <b>Pour les Travailleuses du sexe :</b> <ul style="list-style-type: none"> <li>- Nombre de TS reçus en consultation IST au niveau de la clinique selon l'âge</li> <li>- Nombre de kits d'ADVIH dispensés aux TS lors des consultations IST selon l'âge</li> </ul>                                                                                                                                                                                                                                                            | Fiche « Stratégie fixe TS »  |

#### Sous-séquence 6.2 : Tester les outils

**Durée :** 20 minutes

**Méthode :** En s'appuyant sur le support papier de l'outil de suivi-évaluation (un exemplaire par participant) :

- Les participants testent chaque outil en les renseignant un par un ;
- Le formateur invite les participants à s'exprimer sur l'exercice de renseignement de chaque catégorie d'outils : y-a-t-il des incompréhensions ou des difficultés particulières ?

**Avant de clôturer la séquence, le formateur demande aux participants s'ils ont des questions et y répond.**

|                               |                                                                                                                                                                      |
|-------------------------------|----------------------------------------------------------------------------------------------------------------------------------------------------------------------|
| <b>Séquence n°7</b>           | Conclusion                                                                                                                                                           |
| <b>Objectifs pédagogiques</b> | A la fin de cette séquence, les participants auront :<br>- Abordé les éventuels points incompris<br>- Réalisé une évaluation de la formation et procédé à sa clôture |
| <b>Durée</b>                  | 25 minutes maximum                                                                                                                                                   |
| <b>Matériel</b>               | Pour réaliser cette séquence, le formateur aura besoin :<br>- Du support papier de la fiche d'évaluation de la formation                                             |

### ***Sous-séquence 7.1 : Revenir sur des points incompris et clôturer la formation***

**Durée :** 15 minutes

**Méthode :** Le formateur invite les participants à s'exprimer sur les interrogations, les difficultés ou les craintes qu'ils pourraient avoir, avant de clôturer la formation. Le formateur souhaite bonne chance aux apprenants.

### ***Sous-séquence 7.2 : Apprécier le niveau de satisfaction des participants selon différents paramètres***

**Durée :** 10 minutes

**Méthode :**

- Le formateur distribue la fiche d'évaluation aux apprenants qui procèdent à son renseignement ;
- Le formateur fera une synthèse des fiches d'évaluation à l'issue de la formation.

Le projet ATLAS est mis en œuvre au Mali  
en partenariat avec le Ministère de la Santé  
et de l'Hygiène Publique  
et le Secrétariat Exécutif du Haut Conseil National  
de Lutte contre le Sida.

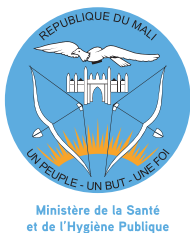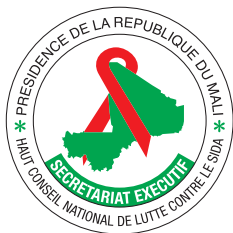

Ce document peut être utilisé ou reproduit sous réserve de mentionner la source,  
et uniquement pour un usage non commercial.
